# Supplementary material for: A Novel Framework for the Identification and Analysis of Duplicons between Human and Chimpanzee
Source: Hindawi journal article supplement (doi:10.1155/2013/264532), 2013-01-01
Supplement: f1 [file 264532.f1.pdf]

## Supplementary Figures

In the supplementary material, we illustrate six phylogenetic trees reconstructed using duplicons within chimpanzee-specific, human-specific, and human/chimpanzee-shared CNVs/SDs.

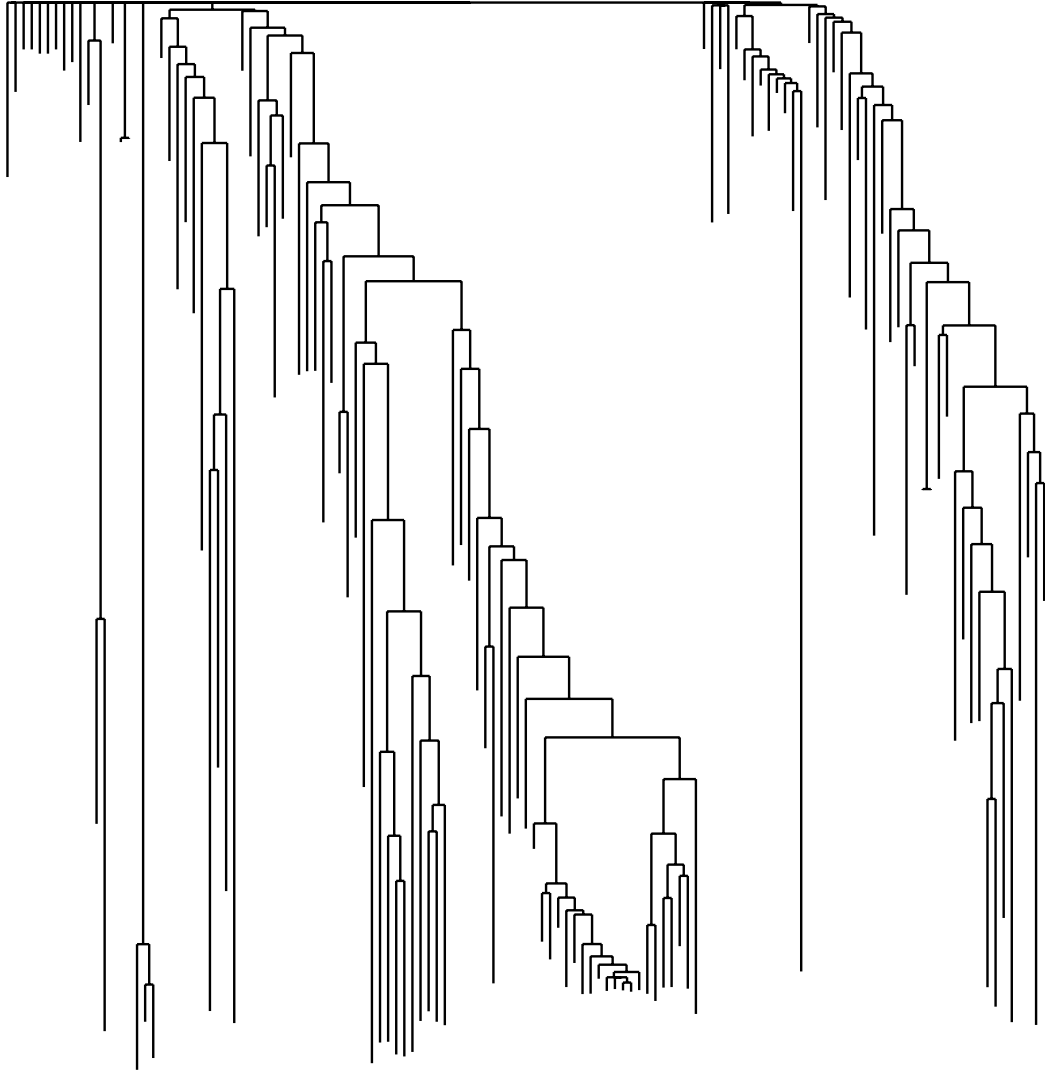

Figure 1: The phylogenetic tree of hierarchical clustering of duplicons for chimpanzee-specific SDs.

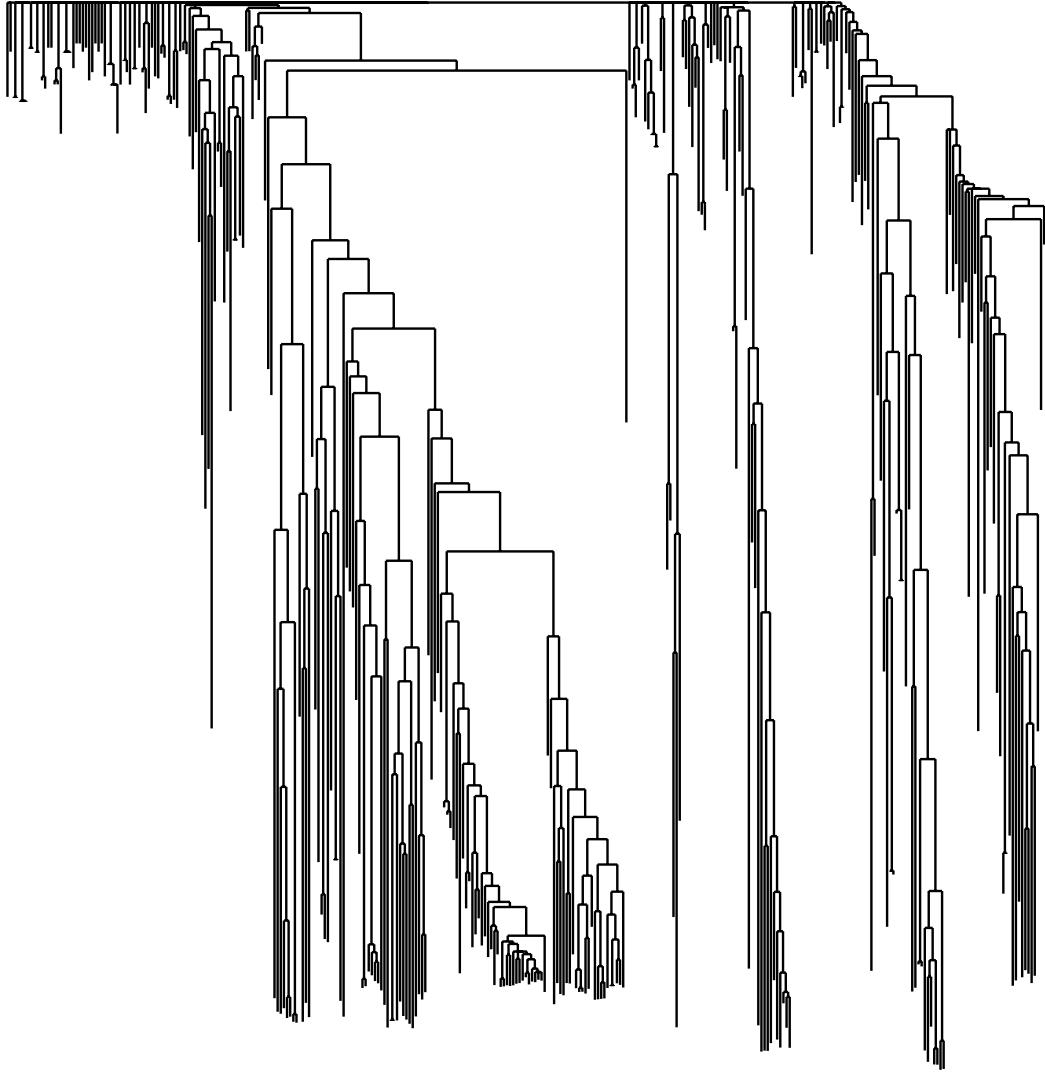

Figure 2: The phylogenetic tree of hierarchical clustering of duplicons for human-specific SDs.

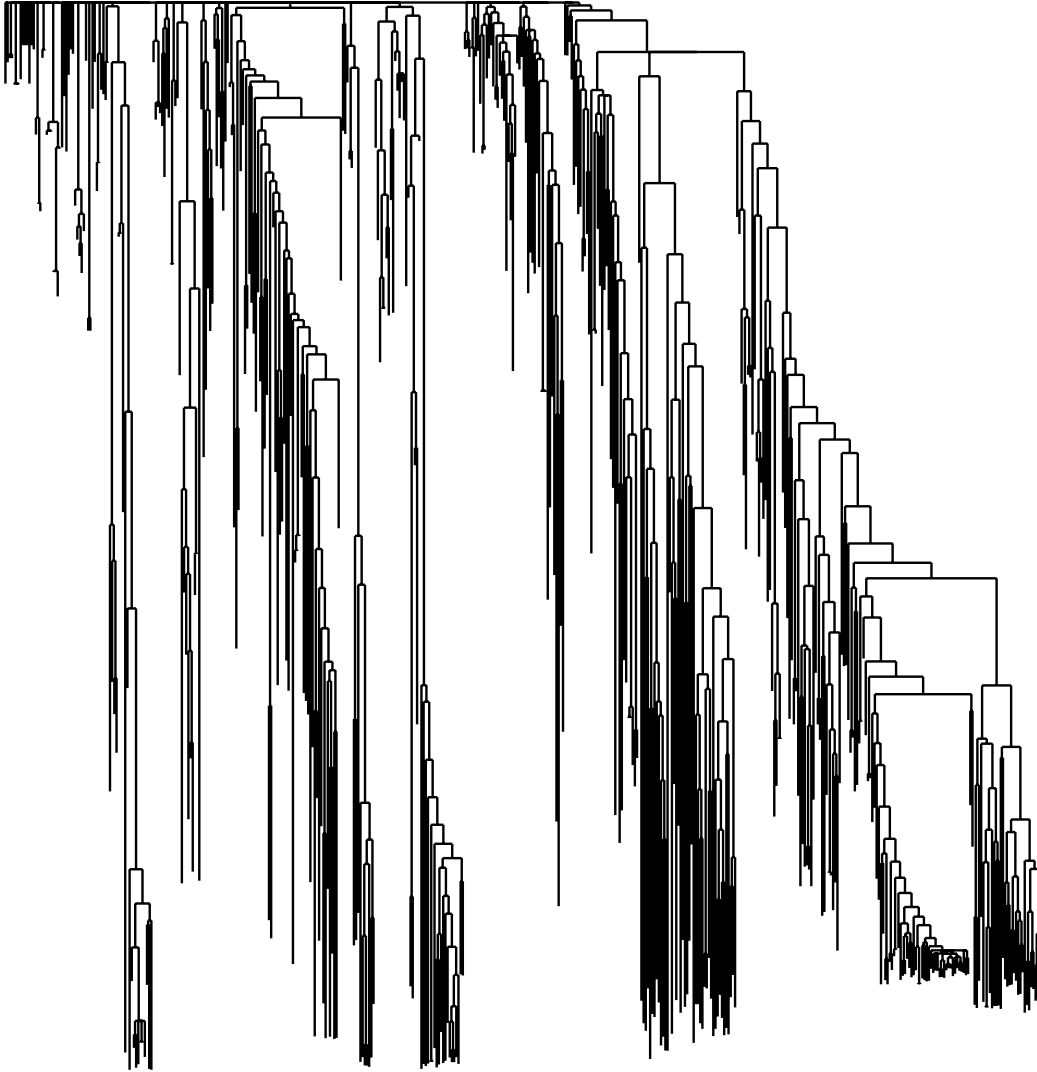

Figure 3: The phylogenetic tree of hierarchical clustering of duplicons for human/chimpanzee-shared SDs.

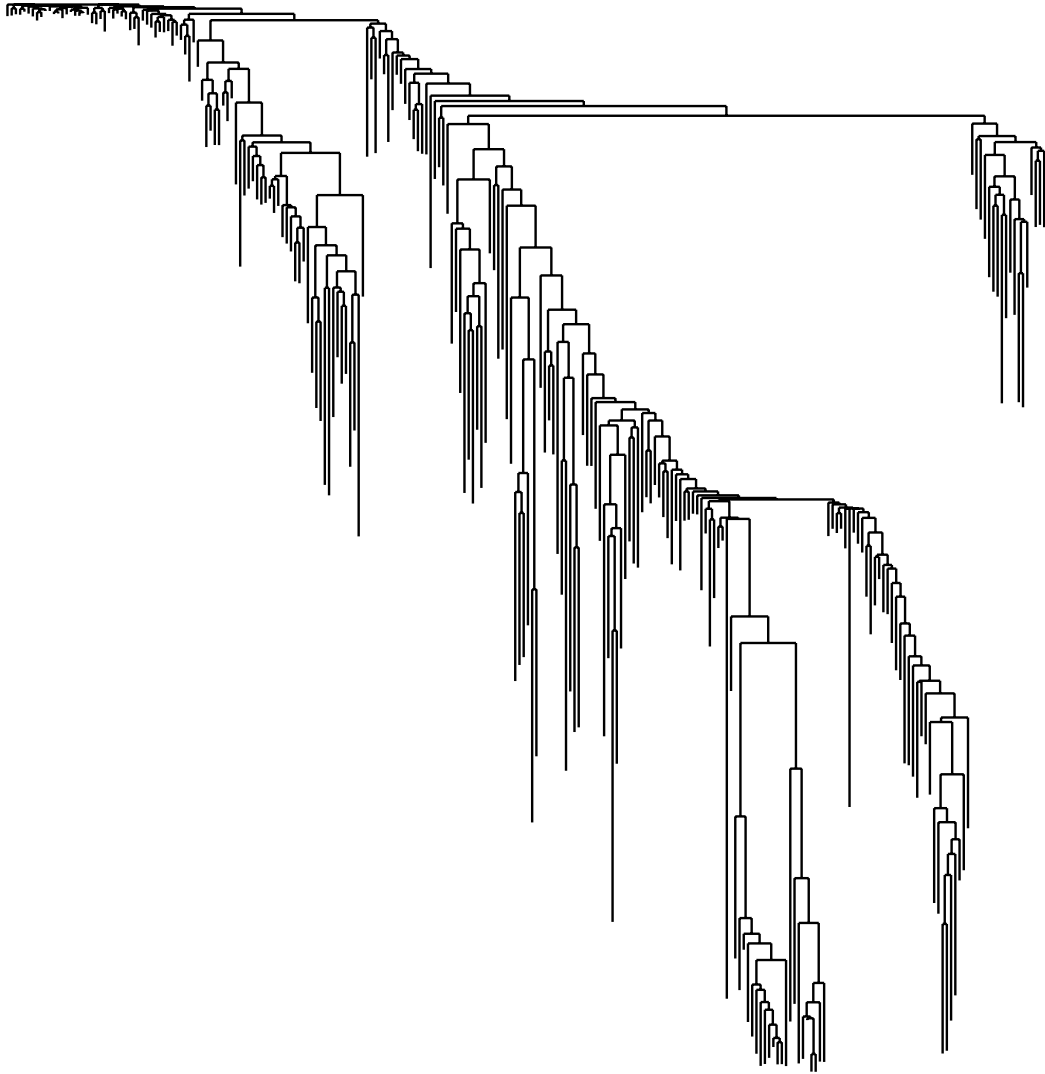

Figure 4: The phylogenetic tree of hierarchical clustering of duplicons for chimpanzee-specific CNVs.

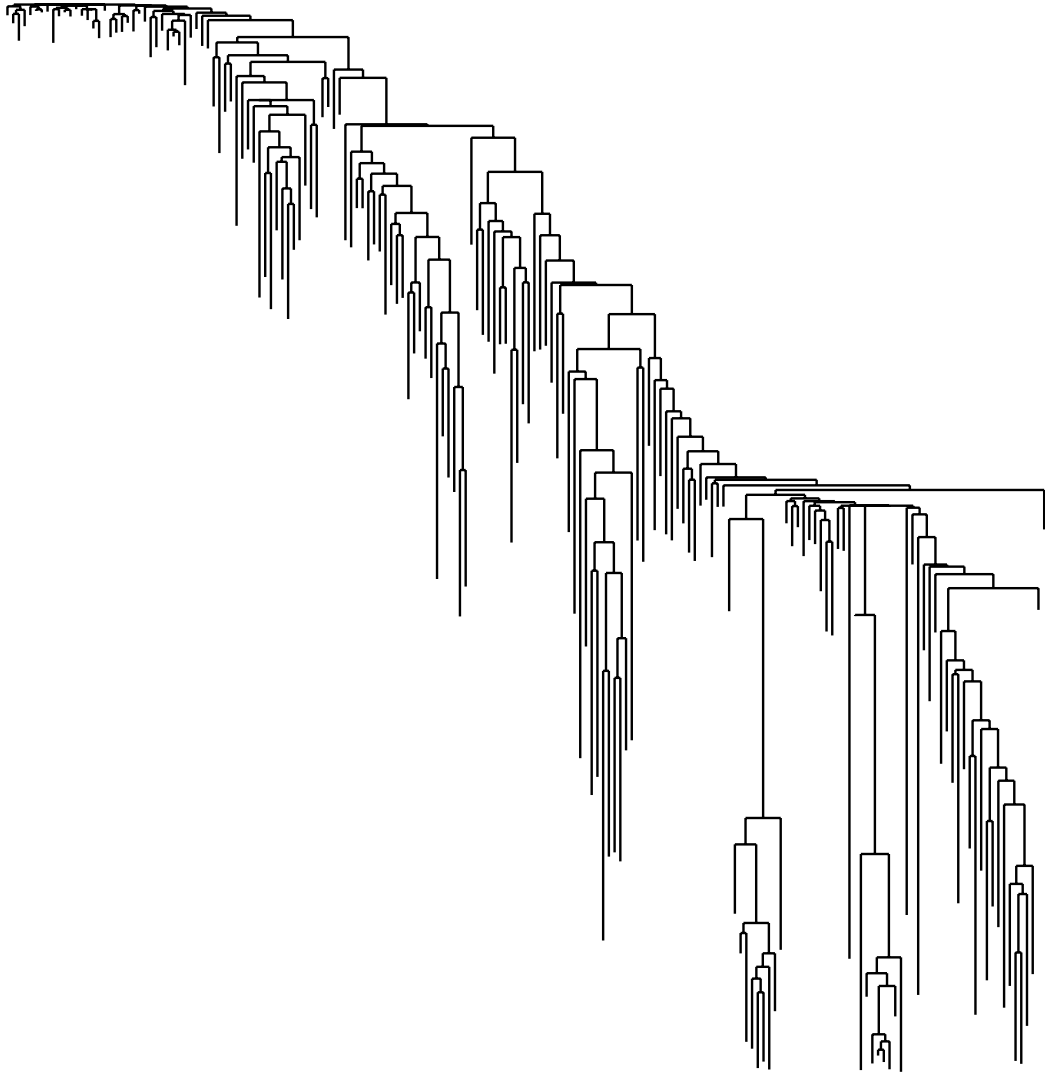

Figure 5: The phylogenetic tree of hierarchical clustering of duplicons for human-specific CNVs.

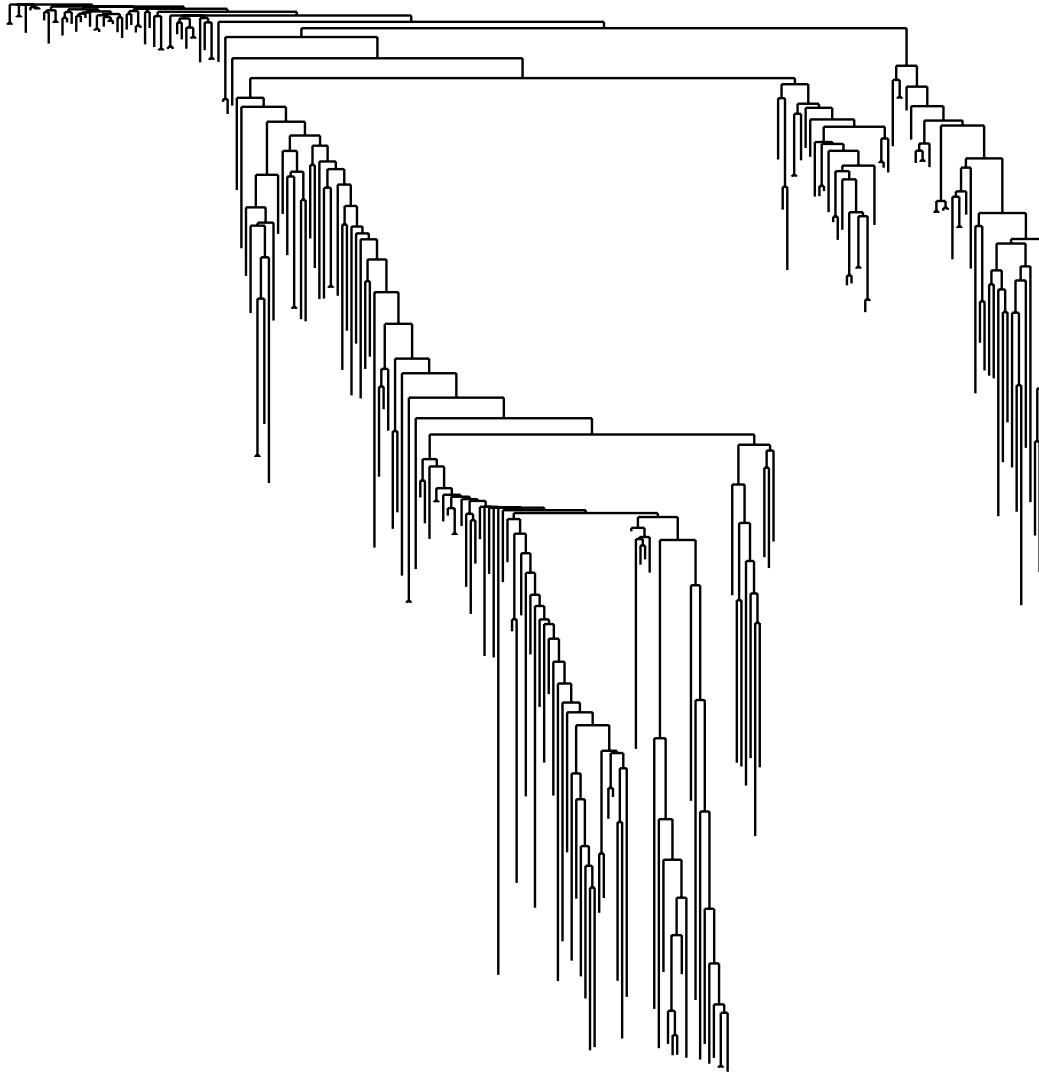

Figure 6: The phylogenetic tree of hierarchical clustering of duplicons for human/chimpanzee-shared CNVs.
